# Supplementary material for: Targeted mutagenesis in cotton (Gossypium hirsutum L.) using the CRISPR/Cas9 system
Source: PubMed Central journal article supplement (PMC5347080; doi:10.1038/srep44304), 2017-03-13
Supplement: srep44304-s1.pdf [file srep44304-s1.pdf]

## **Supplementary Information**

### **Targeted mutagenesis in cotton (*Gossypium hirsutum* L.) using the CRISPR/Cas9 system**

Xiugui Chen<sup>1,2</sup>, Xuke Lu<sup>1</sup>, Na Shu<sup>1</sup>, Shuai Wang<sup>1</sup>, Junjuan Wang<sup>1</sup>, Delong Wang<sup>1</sup>, Lixue Guo<sup>1</sup> and Wuwei Ye<sup>1,\*</sup>

<sup>1</sup> State Key Laboratory of Cotton Biology/Institute of Cotton Research of Chinese Academy of Agricultural Sciences, Anyang, Henan 455000, China

<sup>2</sup> National Key Laboratory of Crop Genetic Improvement, College of Plant Sciences and Technology, Huazhong Agricultural University, Wuhan, Hubei 430070, China

\*Author for correspondence. WY: yew158@163.com.

Supplementary Information contains:

Supplementary Figures S1-S2

Supplementary Tables S1-S4

**A**

*GhCLA1*-F5: 5' - TTGGCCGGATTACAGAAA-3'  
 At\_chrl1 5' - TTGGCCGGATTACAGAAACGGTCGGAGAGTGAATACGATTGCTTCGGGACTGGTCACAGT  
 Dt\_chrl1 5' - TTGGCCGGATTACAGAAACGGTCGGAGAGTGAATACGATTGCTTCGGGACTGGTCACAGT

TCACCCACCAATCTCTGCAGGCTTGGGTATTAAATCCAGTCTCTCGCAITCTTTTTTGCAI  
 TCACCCACCAATCTCTGCAGGCTTGGGTATTAAATCCAGTCTCTCGCAITCTTTTTTGCAI

ATTATATGATGGTTAAAAATTGAAACCAAGATAACTCTTATCGAACCGTATCGAGTTC  
 ATTATATGATGGTTAAAAATTGAAACCAAGATAACTCTTATCGAACCGTATCGAGTTC

TTTGATGTTGCTCTTAGCTAACATGCGATTTTGTGTTTTTTTAAATGAAATTTTTGCTT  
 TTTGATGTTGCTCTTAGCTAACATGCGATTTTGTGTTTTTTTAAATGAAATTTTTGCTT

TTGATATGTTGAAATACTATTTTCAATCCGGTATGCAAACTAGTTTCACTTGAICTTC  
 TTGATATGTTCAAATACTATTTTCAATCCGGTATGCAAACTAGTTTCACTTGGTCTTC

AGAGATTTAACTGTCTTGAATGTTTCGGGTGGACAGGATGGCTGTGGGAAGGGATCTGAA  
 AGAGATTTAACTGTCTTGAATGTTTCGGGTGGACAGGATGGCTGTGGGAAGGGATCTGAA

AGGTGAAAGGAATCATGTTGTTGCCGTCATAAGTGTGATGCTATGACTGCAGCAAGC  
 AGGTGAAAGGAATCATGTTGTTGCTGTCATAAGTGTGATGCTATGACTGCAGCAAGC

TTACGAAGCAATGAACAATGCCGATATCTTGATCTGATATGATTGTTTACTTAAITGA  
 TTACGAAGCAATGAACAATGCCGATATCTTGATCTGATATGATTGTTTACTTAAITGA

CAATAAACCAAGTTTCTCTGCCAATGCCAATC-3'  
 CAATAAACCAAGTTTCTCTGCCAATGCCAATC-3'  
*GhCLA1*-R5: 5' - GATTGCCAGTTGGCAGAG-3'

**B**

*GhVP*-F4: 5' - CAGTTAACCTGTGGATGTATCG-3'  
 At\_chr6 5' - CAGTTAACCTGTGGATGTATCGGTGAACAGGTGCAACATCCCTTTCTTTTACTGAATAT  
 Dt\_chr6 5' - CAGTTAACCTGTGGATGTATCGGTGAACAGGTGCAACATCCCTTTCTTTTACTGAATAT

CAGTATGTTGGCATCTTCATGATTGCTTTTGCTATTTCTGATTTTCCTCTTCTGGGCTCT  
 CAGTATGTTGGCATCTTCATGATTGCTTTTGCTATTTCTGATTTTCCTCTTCTGGGCTCT

GTCGAGGGCTTCAGCATGAAGAGCCAGCCTTGACCTATGATAAGGAGAAGATGTCAA  
 GTTGAAGGGCTTCAGCATGAAGAGCCAGCCTTGACCTATGATAAGGAGAAGATGTCAA

CCAGCTCTTCGCACTGCTATCTTCAGTACTGTATCCTTCTTCTGAGGTGCCATCACTCA  
 CCAGCTCTTCGCACTGCTATCTTCAGTACTGTATCCTTCTTCTGAGGTGCCATCACTCA

**GTCTTTCTGGATTCTTGG**AATGAAAATTGCTACTATGCCAATGCAAGAACACCTTG  
**GTCTTTCTGGATTCTTCTTGG**AATGAAAATTGCTACTATGCCAATGCAAGAACACCTTG

GAAGCAAGAAAAGGTGTGCGAAGGCTTTTATTGTTGCGTTTATGATCTGGTGCAGTAATG  
 GAAGCAAGAAAAGGCTGTGCGAAGGCTTTTATTGTTGCGTTTATGATCTGGTGCAGTAATG

GGTTTTCTCCTTGCAGCAATGGTTTATGGTACTTTACATTGCCAATCAATCTAATCAAG  
 GGTTTTCTCCTTGCAGCAATGGTTTATGGTACTTTACATTGCCAATCAATCTAATCAAG

CTGTACTATGGTATGACTGGGAAGCCCTTTTGGAGCTATTACTGGTTATGGTCTGGT  
 CTGTACTATGGTATGACTGGGAAGCCCTTTTGGAGCTATTACTGGTTATGGTCTGGT

GGATCCCTATGGCACTCTTTG-3'  
 GGATCCCTATGGCACTCTTTG-3'  
*GhVP*-R4: 5' - CAAAGAGTGCATAGAGGATC-3'

**Supplementary Fig. S1.** Identification of target sites and the primer sites for PCR amplification of DNA in the two different genomes. **(A)** Sequences of the PCR fragment of *GhCLA1*. **(B)** Sequences of the PCR fragment of *GhVP*. Red letters represent the target sites, blue letters represent the PAM sequence.

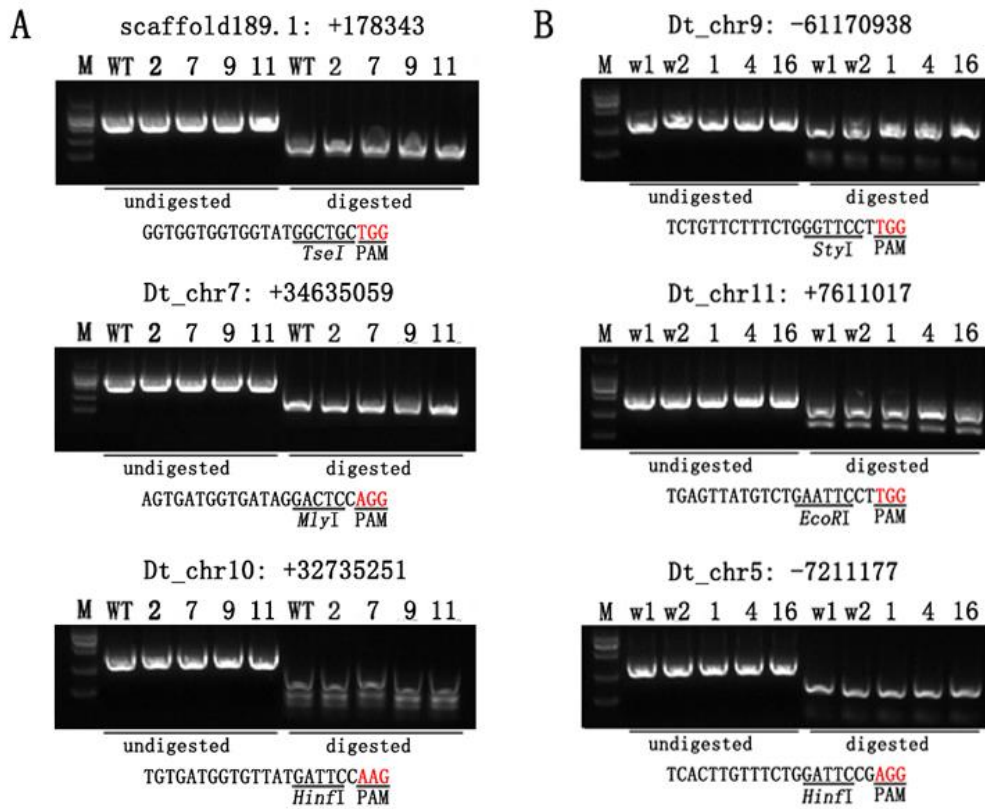

**Supplementary Fig. S2.** Examples of restriction-site loss assays with potential off-targets. **(A)** Analysis examples of potential off-targets from plants containing verified *GhCLA1* gene mutations. **(B)** Analysis examples of potential off-targets from plants containing verified *GhVP* gene mutations. The restriction enzyme sites are showed with an underscore. The PAMs are highlighted with red.

**Supplementary Table S1.** List of primers in this study.

| Usage                 | Primer name       | Sequence (5'-3')       |
|-----------------------|-------------------|------------------------|
| Cloning               | <i>Cas9</i> -F    | TCCTGCAGACAGTGAAGGTG   |
|                       | <i>Cas9</i> -R    | GCCTTATCCAGTTCGCTCAG   |
| Mutation<br>detection | <i>GhCLA1</i> -F5 | TTGGCCGGATTCACGAAA     |
|                       | <i>GhCLA1</i> -R5 | GATTGGCAGTTGGCAGAG     |
|                       | <i>GhVP</i> -F4   | CAGTTAACCTGTGGATGTATCG |
|                       | <i>GhVP</i> -R4   | CAAAGAGTGCCATAGAGGATC  |

**Supplementary Table S2.** Target sequences of two genes in cotton and oligonucleotides used to express sgRNA in the vectors.

| Target gene   | Target site sequences                   | Oligo forward (5'-3')                              | Oligo reverse (5'-3')                                              | Enzyme        |
|---------------|-----------------------------------------|----------------------------------------------------|--------------------------------------------------------------------|---------------|
| <i>GhCLA1</i> | GGTGATGGTGCTATG <u>ACTGC</u> <b>AGG</b> | CAGGAAACAGCTATG<br>ACCATATTCATTCGGA<br>GTTTTTGTATC | gctattctagctctaaaacGCAGTC<br>ATAGCACCATCACCaatcact<br>acttcgactct  | <i>Pst</i> I  |
| <i>GhVP</i>   | TCAGTTCTTTCTGG <u>ATTC</u> <b>CCTGG</b> | CAGGAAACAGCTATG<br>ACCATATTCATTCGGA<br>GTTTTTGTATC | gctattctagctctaaaacAGGAAT<br>CCAGAAAGAACTGACaatc<br>actacttcgactct | <i>Hinf</i> I |

The restriction enzyme sites are showed with an underscore. The PAMs are highlighted with red.

**Supplementary Table S3.** List of potential off-target sites identified for the *GhCLA1* target sequence in the *G. hirsutum* genome.

| Sequence of the putative off-target site | Putative off-target locus | Number of matching bases (include PAM) | Available restriction enzyme cutting site | Tested? |
|------------------------------------------|---------------------------|----------------------------------------|-------------------------------------------|---------|
| GGAGATGGAGCTATGACTGCTGG                  | At_chr10: -32691215       | 20                                     | NO                                        | YES     |
|                                          | Dt_chr8: -13606802        | 20                                     | NO                                        | YES     |
| GGTGATGGAGCAATGACTGCTGG                  | Dt_chr13: +22584502       | 20                                     | NO                                        | YES     |
|                                          | Dt_chr13: +22620167       | 20                                     | NO                                        | YES     |
|                                          | scaffold72.1: -1097120    | 20                                     | NO                                        | YES     |
|                                          | scaffold72.1: -1130168    | 20                                     | NO                                        | NO      |
|                                          | scaffold72.1: -1164191    | 20                                     | NO                                        | NO      |
| GGTGGTGGTGGTATGGCTGCTGG                  | scaffold189.1: +178343    | 19                                     | TseI                                      | YES     |
|                                          | At_chr9: -4372202         | 19                                     | TseI                                      | YES     |
| AGTGATGGTGATAGGACTCCAGG                  | scaffold2376.1: -159740   | 19                                     | MlyI                                      | YES     |
|                                          | Dt_chr7: +34635059        | 19                                     | MlyI                                      | YES     |
| GGTGATGGTGCTGGGCCTGCTGG                  | Dt_chr13: +16377109       | 19                                     | Cac8I                                     | YES     |
| GGTGGTGGTGAATGACTGGGG                    | Dt_chr7: +14078964        | 18                                     | BsrI                                      | YES     |
| TGTGATGGTGTATGATCCAAG                    | Dt_chr10: +32735251       | 18                                     | Hinfi                                     | YES     |
| GGTGATGGTGGTGGCACTGCTGG                  | At_chr8: -16619447        | 18                                     | BtsI                                      | YES     |
| GGTGATGGTGGTGGCAATGCTGG                  | Dt_chr13: -46985487       | 17                                     | BsrDI                                     | NO      |
| GGTGATGGTGGATGACACCAGG                   | Dt_chr13: +20112017       | 19                                     | NO                                        | NO      |
|                                          | Dt_chr7: -19747713        | 19                                     | NO                                        | NO      |
| GGTATGGTGTTCATGATTGCAGG                  | Dt_chr13: -15976702       | 19                                     | NO                                        | NO      |
| GGTGATGGAGCAATGACGGCTGG                  | Dt_chr13: +22563464       | 19                                     | NO                                        | NO      |
| GATGATGGTGCTAGGACTACAAG                  | Dt_chr4: -32253836        | 19                                     | NO                                        | NO      |
| GGTGACTGTGCTAAGCCTGCTGG                  | Dt_chr7: -35412683        | 18                                     | NO                                        | NO      |
| AGTGAGGTTGCTATGAGTGCAAG                  | Dt_chr1: -63423097        | 18                                     | NO                                        | NO      |
| GGTGAGGTTGCTGTGGCTGCTGG                  | scaffold3130.1: +69411    | 18                                     | NO                                        | NO      |
| GGTATGGTACTATGAGTGTAAAG                  | Dt_chr5: -59686925        | 18                                     | NO                                        | NO      |
| GGTATGGCACTATGAGTGTAAAG                  | Dt_chr1: +11783798        | 18                                     | NO                                        | NO      |
|                                          | Dt_chr1: -80500846        | 18                                     | NO                                        | NO      |

The restriction sites are shown with an underscore; mismatching bases are shown in blue.

**Supplementary Table S3.** List of potential off-target sites identified for the *GhCLA1* target sequence in the *G. hirsutum* genome (continued).

| Sequence of the putative off-target site          | Putative off-target locus | Number of matching bases (include PAM) | Available restriction enzyme cutting site | Tested? |
|---------------------------------------------------|---------------------------|----------------------------------------|-------------------------------------------|---------|
| GGTGA <u>CT</u> GTGCTGAG <u>C</u> CTGCTGG         | Dt_chr1: +65502164        | 17                                     | NO                                        | NO      |
|                                                   | At_chr2: +58074573        | 17                                     | NO                                        | NO      |
|                                                   | Dt_chr11: +25261498       | 17                                     | NO                                        | NO      |
|                                                   | Dt_chr11: +54287243       | 17                                     | NO                                        | NO      |
|                                                   | Dt_chr10: -39718103       | 17                                     | NO                                        | NO      |
|                                                   | Dt_chr4: +25237184        | 17                                     | NO                                        | NO      |
| GGTGA <u>CT</u> ATGCTAAG <u>C</u> CTGCTGG         | At_chr2: +58103544        | 17                                     | NO                                        | NO      |
| G <u>T</u> TG <u>C</u> TATGCTATGACTG <u>A</u> TGG | Dt_chr5: +1180457         | 17                                     | NO                                        | NO      |
| G <u>T</u> TGATGGTGCCATAAGT <u>G</u> TGG          | Dt_chr13: +21995540       | 17                                     | NO                                        | NO      |

The restriction sites are shown with an underscore; mismatching bases are shown in blue.

**Supplementary Table S4.** List of potential off-target sites identified for the *GhVP* target sequence in the *G. hirsutum* genome.

| Sequence of the putative off-target site                    | Putative off-target locus | Number of matching bases (include PAM) | Available restriction enzyme cutting site | Tested? |
|-------------------------------------------------------------|---------------------------|----------------------------------------|-------------------------------------------|---------|
| TC <u>T</u> GTTCTTTCTGG <u>G</u> TTCC <u>T</u> TGG          | Dt_chr9: -61170938        | 21                                     | StyI                                      | YES     |
| TCAGTTCTTAT <u>T</u> GGATT <u>G</u> CTTGG                   | Dt_chr4: +27630888        | 20                                     | Tth111II                                  | YES     |
|                                                             | Dt_chr4: +27631776        | 20                                     | Tth111II                                  | YES     |
|                                                             | At_chr4: +87726589        | 20                                     | Tth111II                                  | YES     |
|                                                             | At_chr4: +87727477        | 20                                     | Tth111II                                  | YES     |
|                                                             | At_chr4: +87728332        | 20                                     | Tth111II                                  | NO      |
| TCAG <u>T</u> CTTTGAGGATT <u>C</u> CTTGG                    | Dt_chr9: +42031687        | 20                                     | Hinfl                                     | YES     |
| TGAGTTAT <u>G</u> TCTGA <u>A</u> TTCC <u>T</u> TGG          | Dt_chr11: +7611017        | 19                                     | EcoRI                                     | YES     |
|                                                             | At_chr4: +71425367        | 19                                     | EcoRI                                     | YES     |
| TGAGTTAT <u>A</u> TCTGA <u>A</u> TTCC <u>T</u> TGG          | At_chr11: -60320285       | 19                                     | EcoRI                                     | YES     |
| TC <u>A</u> CTTGTTTCTGGATT <u>C</u> CGAGG                   | Dt_chr5: -7211177         | 19                                     | Hinfl                                     | YES     |
| TCTGTT <u>G</u> TACTGGATT <u>C</u> CTTAG                    | At_chr6: +53150767        | 19                                     | Hinfl                                     | YES     |
| TCAGATCATTCTT <u>G</u> ATTCC <u>A</u> CGG                   | At_chr12: -22967324       | 18                                     | Hinfl                                     | YES     |
|                                                             | At_chr3: +27499491        | 18                                     | Hinfl                                     | YES     |
| TCTGTT <u>G</u> TAACTGGATT <u>C</u> CTTAG                   | Dt_chr6: +11310880        | 18                                     | Hinfl                                     | YES     |
| TCAGATCATTCTT <u>G</u> ATTCC <u>G</u> CGG                   | Dt_chr9: -42381100        | 18                                     | Hinfl                                     | YES     |
| TC <u>C</u> TTTCTTTG <u>T</u> GGAT <u>G</u> CCT <u>C</u> GG | scaffold165.1: +486549    | 18                                     | SfaNI                                     | YES     |
| TTAGTAGTTT <u>C</u> AGGATT <u>C</u> CTTAG                   | Dt_chr11: -41707429       | 18                                     | Hinfl                                     | YES     |
| TCATTTCTT <u>C</u> GTAGAT <u>G</u> CCT <u>C</u> GG          | At_chr2: -22997961        | 17                                     | SfaNI                                     | NO      |
| TCATTTCTT <u>C</u> GCGGAT <u>G</u> CCT <u>C</u> GG          | At_chr9: -47177313        | 17                                     | SfaNI                                     | NO      |
| TC <u>C</u> TTTCTTTG <u>T</u> AGAT <u>G</u> CCT <u>C</u> GG | At_chr3: -41473876        | 17                                     | SfaNI                                     | NO      |
|                                                             | Dt_chr1: +10912255        | 17                                     | SfaNI                                     | NO      |
|                                                             | At_chr9: +49349713        | 17                                     | SfaNI                                     | NO      |
| TCAGATCTTTCTT <u>G</u> TTCC <u>T</u> AGG                    | scaffold4724.1: -30530    | 19                                     | NO                                        | NO      |
| TCATTTCTTTTGGATT <u>T</u> TAGG                              | Dt_chr8: +15208796        | 18                                     | NO                                        | NO      |
| TAATTTGTTTCTGG <u>T</u> TCCTTAG                             | Dt_chr11: +12832761       | 18                                     | NO                                        | NO      |
| TAATTTGTTTCTGG <u>T</u> TC <u>T</u> TAG                     | Dt_chr2: +13309509        | 17                                     | NO                                        | NO      |
|                                                             | At_chr2: +60047189        | 17                                     | NO                                        | NO      |

The restriction sites are shown with an underscore; mismatching bases are shown in blue.
